# Supplementary material
Source: PubMed Central journal article supplement (PMC4453229)

# accuracy of FTI BV

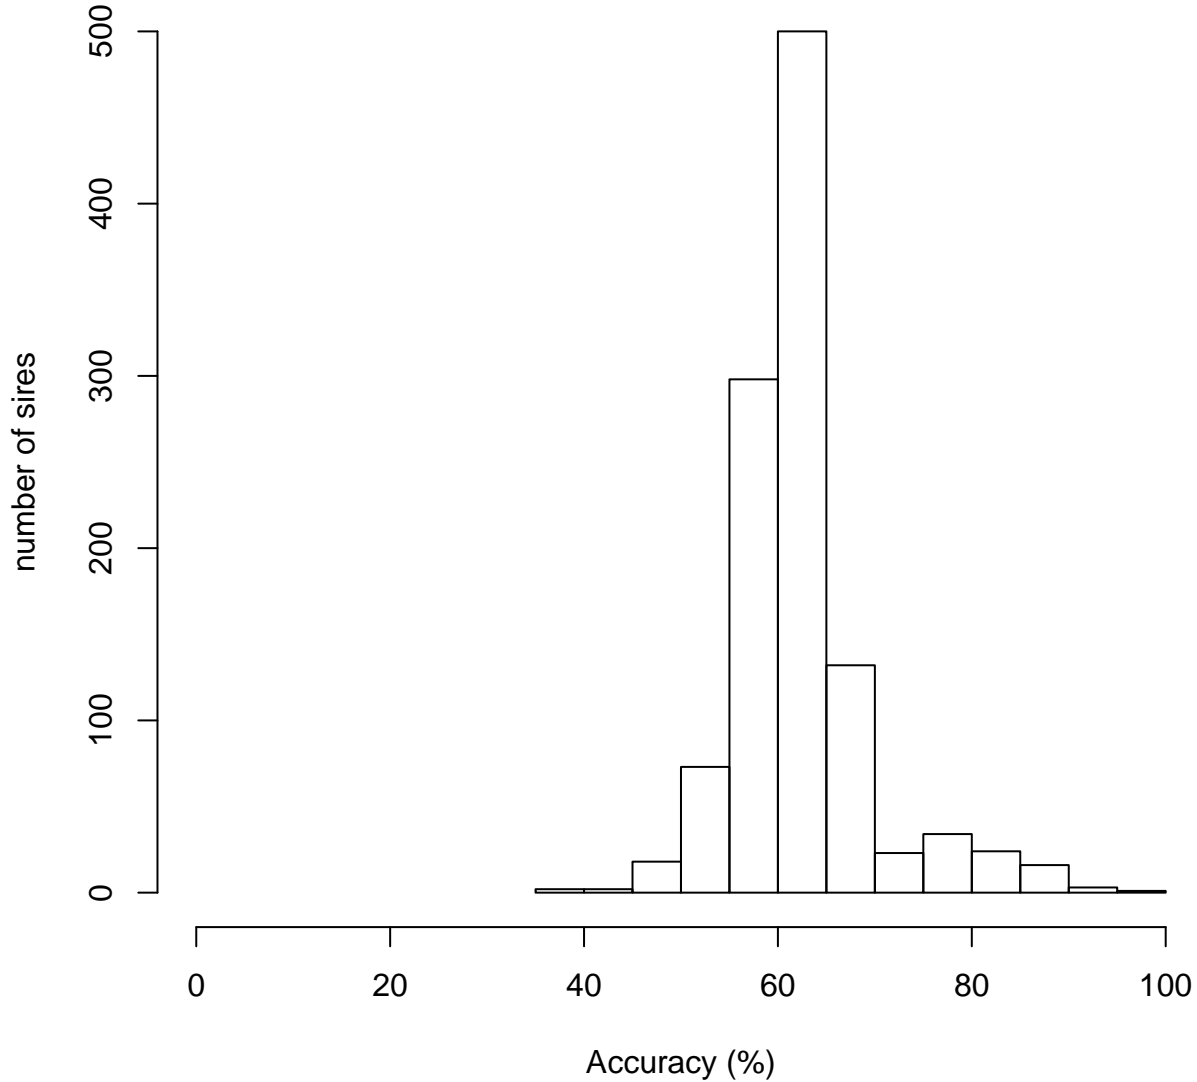

Supplement: 12863_2015_210_MOESM1_ESM.pdf [file 12863_2015_210_MOESM1_ESM.pdf]
